# Supplementary material
Source: PubMed Central journal article supplement (PMC9031057)
Supplement: NIHMS1796631-supplement-Supplement.pdf [file NIHMS1796631-supplement-Supplement.pdf]

## **SUPPLEMENTAL MATERIAL**

### **Hypertensive diseases in pregnancy and kidney function later in life: The Genetic Epidemiology Network of Arteriopathy (GENOA) study.**

Adebamike A. Oshunbade; Seth T. Lirette; B. Gwen Windham; Tariq Shafi; Arsalan Hamid; Semiu O. Gbadamosi; Adrienne Tin;

Wondwosen K. Yimer; Martin Tibuakuu; Donald Clark III; Daisuke Kamimura; Elizabeth A. Lutz; Robert J. Mentz; Ervin R. Fox;

Javed Butler; Kenneth R. Butler; Vesna D. Garovic; Stephen T. Turner; Thomas H. Mosley Jr.; Michael E. Hall

## **Table of Contents**

I. Supplemental TABLE 1

II. Supplemental TABLE 2

III. Supplemental TABLE 3

IV. Supplemental TABLE 4

V. Supplemental TABLE 5

VI. Supplemental TABLE 6

VII. Supplemental Figure

**Supplemental TABLE 1:** Differences in eGFR <60 ml/1.73m<sup>2</sup> Later in Life Across Pregnancy History categories with Normotensive pregnancies as the reference group \*

| <b>Model</b>      | <b>Normotensive pregnancy</b> | <b>Nulliparous</b>                 | <b>Hypertensive pregnancy</b>                 | <b>Preeclamptic Pregnancy</b>        |
|-------------------|-------------------------------|------------------------------------|-----------------------------------------------|--------------------------------------|
| <b>Unadjusted</b> | reference                     | -4.79 (-15.98, 6.38) <i>P</i> =.40 | <b>-12.66 (-21.32, -4.00) <i>P</i>&lt;.01</b> | -13.55 (-34.60, 7.50) <i>P</i> = .21 |
| <b>Model 1</b>    | reference                     | -4.76 (-15.42,5.90) <i>P</i> =.38  | <b>-13.01 (-21.14, -4.7) <i>P</i>&lt;.01</b>  | -11.55 (-31.17, 8.05) <i>P</i> =.25  |
| <b>Model 2</b>    | reference                     | -4.22 (-13.04,4.59) <i>P</i> =.35  | <b>-9.13 (-17.27, -0.99) <i>P</i>=.03</b>     | -6.88 (-20.36, 6.60) <i>P</i> =.32   |

All values for Cystatin C Estimated GFR are expressed as adjusted  $\beta$  coefficients, with 95% confidence intervals and *P*-values; *P*-values in bold are significant; Model 1: adjusted for age and race; Model 2: plus level of education, smoking history, hypertension, Body Mass Index (BMI), and diabetes

\* mean age of the participants at the time of kidney function measurements was 59 ± 9 years

**Supplemental TABLE 2:** Odds of eGFR <60 ml/1.73m<sup>2</sup> Later in Life Across Pregnancy Groups with Normotensive pregnancies as the reference group\*

| <b>Model</b>      | <b>Normotensive pregnancy</b> | <b>Nulliparous</b>              | <b>Hypertensive pregnancy</b>            | <b>Preeclamptic Pregnancy</b>          |
|-------------------|-------------------------------|---------------------------------|------------------------------------------|----------------------------------------|
| <b>Unadjusted</b> | 1 (Reference)                 | 1.46 (0.72, 2.95) <i>P</i> =.29 | <b>2.04 (1.26, 3.32) <i>P</i>&lt;.01</b> | <b>2.99 (1.06, 8.41) <i>P</i>=.04</b>  |
| <b>Model 1</b>    | 1 (Reference)                 | 1.89 (0.88, 4.02) <i>P</i> =.10 | <b>2.24 (1.35, 3.70) <i>P</i>&lt;.01</b> | <b>3.56 (1.05, 12.01) <i>P</i>=.04</b> |
| <b>Model 2</b>    | 1 (Reference)                 | 1.89 (0.90, 3.96) <i>P</i> =.09 | <b>1.86 (1.06, 3.25) <i>P</i>=.03</b>    | 2.61 (0.86, 7.87) <i>P</i> =.09        |

All values for Cystatin C Estimated GFR are expressed as adjusted OR, Odds ratios, with 95% confidence intervals and *P*-values; *P*-values in bold are significant; Model 1: adjusted for age and race; Model 2: plus level of education, smoking history, hypertension, Body Mass Index (BMI), and diabetes

\* mean age of the participants at the time of kidney function measurements was 59 ± 9 years

**Supplemental TABLE 3:** Distribution of Abnormal Kidney function measurements Across Pregnancy Groups

|                               | <b>Normotensive<br/>Pregnancy</b> | <b>Nulliparous</b> | <b>Hypertensive<br/>Pregnancy</b> | <b>Preeclamptic<br/>Pregnancy</b> |
|-------------------------------|-----------------------------------|--------------------|-----------------------------------|-----------------------------------|
| <b>mGFR &lt; 60</b>           | 85                                | 9                  | 27                                | 4                                 |
| <b>eGFR &lt; 60</b>           | 67                                | 10                 | 24                                | 5                                 |
| <b>**UACR &gt; 30 mg/g Cr</b> | 41                                | 1                  | 10                                |                                   |

\* represents the number of participants with UACR>30mg/g Cr among our analytical cohort (n=380) that had available data on UACR; eGFR was estimated using cystatin C

**Supplemental Table 4:** Differences in mGFR <60 ml/1.73m<sup>2</sup> Later in Life in women classified as having history of HDP compared with Normotensive pregnancies \*

| <b>Model</b>      | <b>Normotensive pregnancy</b> | <b>Nulliparous</b>               | <b>HDP</b>                                  |
|-------------------|-------------------------------|----------------------------------|---------------------------------------------|
| <b>Unadjusted</b> | reference                     | 3.06 (-2.63, 8.75) <i>P</i> =.29 | <b>-5.09 (-9.38, -0.80) <i>P</i>=.02</b>    |
| <b>Model 1</b>    | reference                     | -1.46 (-6.96,4.03) <i>P</i> =.60 | <b>-5.46 (-9.68, -1.03) <i>P</i>&lt;.01</b> |
| <b>Model 2</b>    | reference                     | -1.14 (-6.64,4.35) <i>P</i> =.68 | <b>-4.78 (-8.97, -0.58) <i>P</i>=.03</b>    |

All values for mGFR are expressed as adjusted  $\beta$  coefficients, with 95% confidence intervals and *P*-values; *P*-values in bold are significant; Model 1: adjusted for age and race; Model 2: plus level of education, smoking history, hypertension, Body Mass Index (BMI), and diabetes ; HDP represents Hypertensive diseases in pregnancy (history of hypertensive pregnancy or history of preeclampsia combined as a single group)

\* mean age of the participants at the time of kidney function measurements was 59  $\pm$  9 years

**Supplemental Table 5:** Odds of mGFR <60 ml/1.73m<sup>2</sup> Later in Life in women classified as having history of HDP compared with Normotensive pregnancies \*

| <b>Model</b>      | <b>Normotensive pregnancy</b> | <b>Nulliparous</b>              | <b>HDP</b>                               |
|-------------------|-------------------------------|---------------------------------|------------------------------------------|
| <b>Unadjusted</b> | 1 (reference)                 | 0.95 (0.47, 1.93) <i>P</i> =.91 | <b>1.87 (1.16, 3.03) <i>P</i>=.01</b>    |
| <b>Model 1</b>    | 1 (reference)                 | 1.38 (0.67, 2.86) <i>P</i> =.37 | <b>2.01 (1.23, 3.29) <i>P</i>&lt;.01</b> |
| <b>Model 2</b>    | 1 (reference)                 | 1.49 (0.73, 3.06) <i>P</i> =.27 | <b>2.09 (1.24, 3.52) <i>P</i>&lt;.01</b> |

All values for mGFR are expressed as adjusted OR, Odds ratios, with 95% confidence intervals and *P*-values; *P*-values in bold are significant; Model 1: adjusted for age and race; Model 2: plus level of education, smoking history, hypertension, Body Mass Index (BMI), and diabetes ; HDP represents Hypertensive diseases in pregnancy (history of hypertensive pregnancy or history of preeclampsia combined as a single group)

\* mean age of the participants at the time of kidney function measurements was 59 ± 9 years

**Supplemental Table 6:** Odds of Chronic Kidney Disease (CKD) Later in Life in women classified as having history of HDP \*

| <b>Model</b>      | <b>Normotensive pregnancy</b> | <b>Nulliparous</b>               | <b>HDP</b>                                |
|-------------------|-------------------------------|----------------------------------|-------------------------------------------|
| <b>Unadjusted</b> | 1 (reference)                 | 2.32 (0.26, 20.43) <i>P</i> =.45 | <b>4.50 (1.46, 13.84) <i>P</i>&lt;.01</b> |
| <b>Model 1</b>    | 1 (reference)                 | 2.44 (0.27, 21.54) <i>P</i> =.42 | <b>4.38 (1.41, 13.56) <i>P</i>&lt;.01</b> |
| <b>Model 2</b>    | 1 (reference)                 | 2.26 (0.27, 18.88) <i>P</i> =.45 | <b>3.97 (1.32, 11.90) <i>P</i>&lt;.01</b> |

n=387; All values for mGFR are expressed as adjusted OR, Odds ratios, with 95% confidence intervals and *P*-values; *P*-values in bold are significant;

Model 1:adjusted for age and race; Model 2: plus level of education, smoking history, hypertension, Body Mass Index (BMI), and diabetes ; HDP represents Hypertensive diseases in pregnancy (history of hypertensive pregnancy or history of preeclampsia combined as a single group)

\*CKD defined as mGFR <60 ml/min/1.73 m<sup>2</sup> or UACR ≥30 mg/g

\*\* mean age of the participants at the time of kidney function measurements was 59 ± 9 years



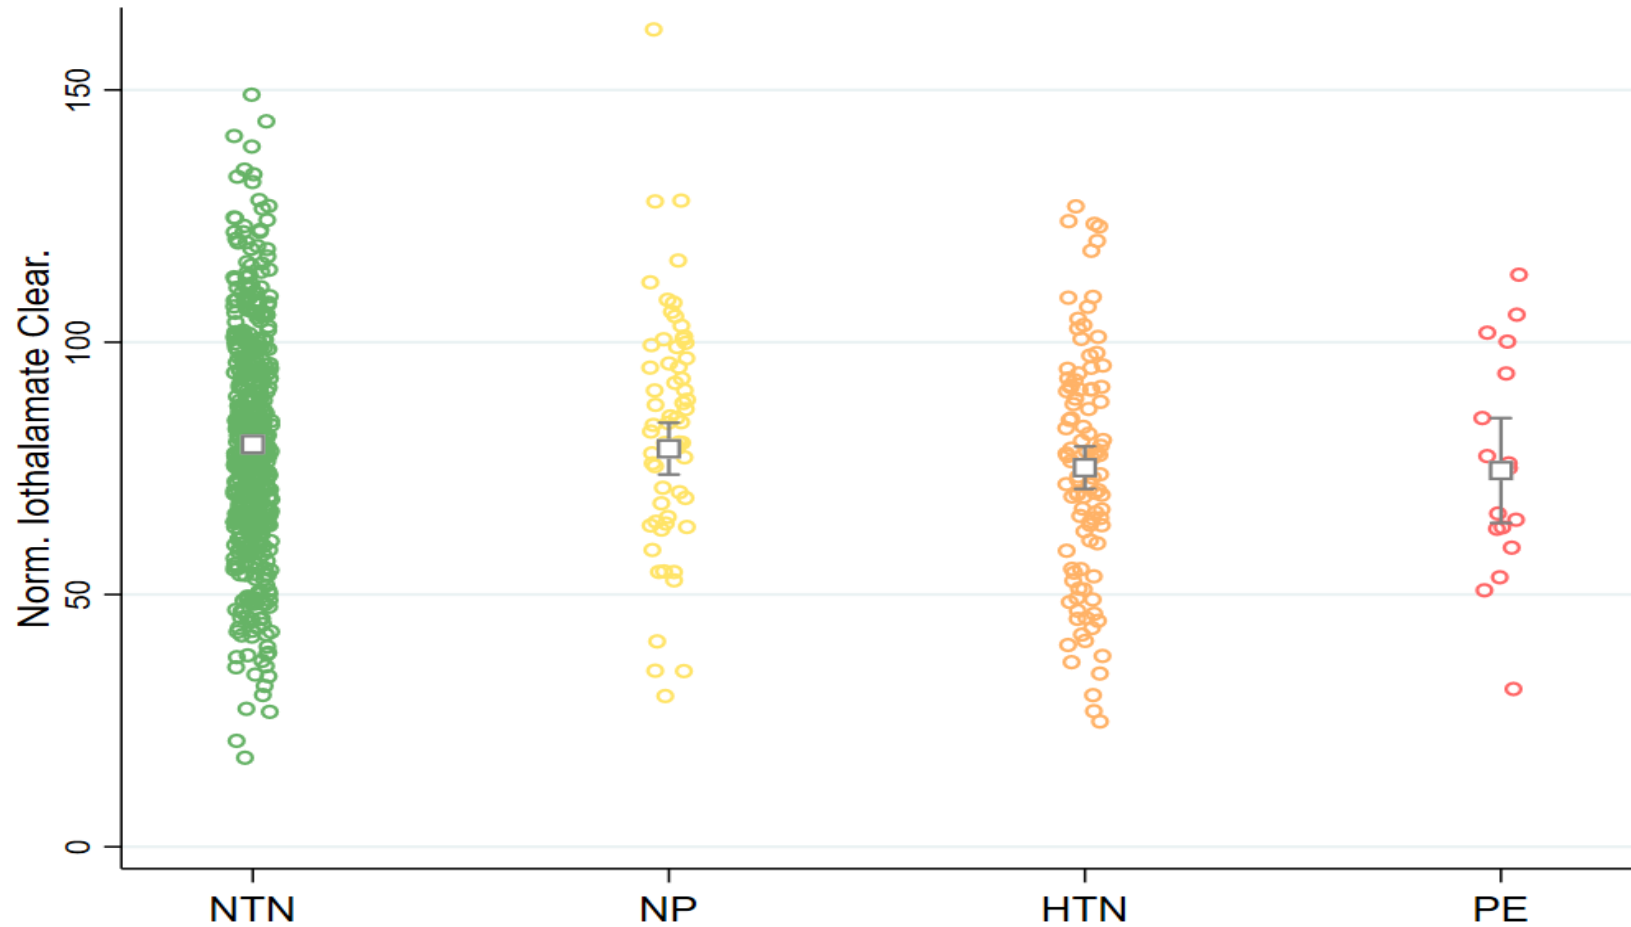

### Supplemental Figure

Plots for adjusted average measures of kidney function with 95% confidence bands across pregnancy history categories (from Model 2)

NP- Nulliparous; NTN-Normotensive Pregnancy; HTN-Hypertensive pregnancy; PE-Preeclamptic Pregnancy
